# Supplementary material for: Prevalence of Metabolic Syndrome in Children and Adolescents with Type 1 Diabetes Mellitus and Possibilities of Prevention and Treatment: A Systematic Review
Source: MDPI journal article supplement (doi:10.3390/nu13061782), 2021-05-23
Supplement: s1 [file s1]

## Supplementary Material

# Prevalence of Metabolic Syndrome in Children and Adolescents with Type 1 Diabetes Mellitus and Possibilities of Prevention and Treatment: A Systematic Review

Monika Grabia, Renata Markiewicz-Żukowska\* and Katarzyna Socha

<sup>1</sup> Department of Bromatology, Faculty of Pharmacy with the Division of Laboratory Medicine, Medical University of Białystok, Mickiewicza 2D Street, 15-222 Białystok, Poland; monika.grabia@umb.edu.pl (M.G.); katarzyna.socha@umb.edu.pl (K.S.)

\* Correspondence: renmar@poczta.onet.pl; Tel.: +48-85-748-5469

Table S1 MeSH terms.

Search: (((((((diabetes type 1) OR (T1DM)) OR (T1D)) AND (children)) OR (adolescents)) OR (youth)) OR (teenagers)) AND (metabolic syndrome)  
 (((("diabetes mellitus, type 1"[MeSH Terms] OR "type 1 diabetes mellitus"[All Fields] OR "diabetes type 1"[All Fields] OR "T1DM"[All Fields] OR "T1D"[All Fields]) AND ("child"[MeSH Terms] OR "child"[All Fields] OR "children"[All Fields] OR "child s"[All Fields] OR "children s"[All Fields] OR "childrens"[All Fields] OR "childs"[All Fields])) OR ("adolescences"[All Fields] OR "adolescence"[All Fields] OR "adolescent"[MeSH Terms] OR "adolescent"[All Fields] OR "adolescence"[All Fields] OR "adolescents"[All Fields] OR "adolescent s"[All Fields]) OR ("adolescent"[MeSH Terms] OR "adolescent"[All Fields] OR "youth"[All Fields] OR "youths"[All Fields] OR "youth s"[All Fields]) OR ("adolescent"[MeSH Terms] OR "adolescent"[All Fields] OR "teenage"[All Fields] OR "teenager"[All Fields] OR "teenagers"[All Fields] OR "teenaged"[All Fields] OR "teenager s"[All Fields] OR "teenages"[All Fields])) AND ("metabolic syndrome"[MeSH Terms] OR ("metabolic"[All Fields] AND "syndrome"[All Fields]) OR "metabolic syndrome"[All Fields])

## Translations

**diabetes type 1:** "diabetes mellitus, type 1"[MeSH Terms] OR "type 1 diabetes mellitus"[All Fields] OR "diabetes type 1"[All Fields]

**children:** "child"[MeSH Terms] OR "child"[All Fields] OR "children"[All Fields] OR "child's"[All Fields] OR "children's"[All Fields] OR "childrens"[All Fields] OR "childs"[All Fields]

**adolescents:** "adolescences"[All Fields] OR "adolescence"[All Fields] OR "adolescent"[MeSH Terms] OR "adolescent"[All Fields] OR "adolescence"[All Fields] OR "adolescents"[All Fields] OR "adolescent's"[All Fields]

**youth:** "adolescent"[MeSH Terms] OR "adolescent"[All Fields] OR "youth"[All Fields] OR "youths"[All Fields] OR "youth's"[All Fields]

**teenagers:** "adolescent"[MeSH Terms] OR "adolescent"[All Fields] OR "teenage"[All Fields] OR "teenager"[All Fields] OR "teenagers"[All Fields] OR "teenaged"[All Fields] OR "teenager's"[All Fields] OR "teenages"[All Fields]

**metabolic syndrome:** "metabolic syndrome"[MeSH Terms] OR ("metabolic"[All Fields] AND "syndrome"[All Fields]) OR "metabolic syndrome"[All Fields]

**Table S2** The assessment of methodological quality included studies.

| Question number | Criteria                                                                   | Castro-Correia [14] | Köken [15]  | Łuczyński [16] | Saki [17]   | Saki [18]   | Soliman [19] | Szadkowska [20] | Valerio [21] | Van Vliet [22] |
|-----------------|----------------------------------------------------------------------------|---------------------|-------------|----------------|-------------|-------------|--------------|-----------------|--------------|----------------|
| 1.              | Research question                                                          | yes                 | yes         | yes            | yes         | yes         | yes          | yes             | yes          | yes            |
| 2.              | Study population                                                           | yes                 | c/d         | yes            | yes         | yes         | yes          | yes             | yes          | yes            |
| 3.              | Participation rate                                                         | no                  | n/r         | n/r            | n/r         | n/r         | n/r          | n/r             | yes          | n/r            |
| 4.              | Groups recruited from the same population and uniform eligibility criteria | yes                 | yes         | yes            | yes         | yes         | yes          | yes             | yes          | yes            |
| 5.              | Sample size justification                                                  | no                  | no          | no             | yes         | yes         | no           | no              | no           | no             |
| 6.              | Exposure assessed prior to outcome measurement                             | no                  | no          | no             | no          | no          | no           | no              | no           | no             |
| 7.              | Sufficient timeframe of effect                                             | no                  | no          | no             | no          | no          | no           | no              | no           | no             |
| 8.              | Different levels of the exposure of interest                               | n/a                 | n/a         | n/a            | n/a         | n/a         | n/a          | n/a             | n/a          | n/a            |
| 9.              | Exposure measures and assessment                                           | yes                 | yes         | yes            | yes         | yes         | yes          | yes             | yes          | yes            |
| 10.             | Repeated exposure assessment                                               | no                  | no          | no             | no          | no          | no           | no              | no           | no             |
| 11.             | Outcome measures                                                           | yes                 | yes         | yes            | yes         | yes         | yes          | yes             | yes          | yes            |
| 12.             | Blinding                                                                   | n/a                 | n/a         | n/a            | n/a         | n/a         | n/a          | n/a             | n/a          | n/a            |
| 13.             | Follow-up rate                                                             | n/a                 | n/a         | n/a            | n/a         | n/a         | n/a          | n/a             | n/a          | n/a            |
| 14.             | Confounding                                                                | n/r                 | n/r         | yes            | n/r         | n/r         | no           | no              | yes          | yes            |
|                 | <b>Quality category</b>                                                    | <b>fair</b>         | <b>fair</b> | <b>good</b>    | <b>good</b> | <b>good</b> | <b>fair</b>  | <b>fair</b>     | <b>good</b>  | <b>good</b>    |

Each question could be answered with yes (the item scored 1 points), no or other (c/d, cannot determine; n/a, not applicable; n/r, not reported).
